# Supplementary material for: Metformin Prevents Key Mechanisms of Obesity-Related Complications in Visceral White Adipose Tissue of Obese Pregnant Mice
Source: MDPI journal article supplement (doi:10.3390/nu14112288), 2022-05-30
Supplement: s1 [file s1]

## Supplementary Material

# Metformin prevents key mechanisms of obesity-related complications in visceral white adipose tissue of obese pregnant mice

Katrin Schmitz, Eva-Maria Turnwald, Tobias Kretschmer, Ruth Janoschek, Inga Bae-Gartz, Kathrin

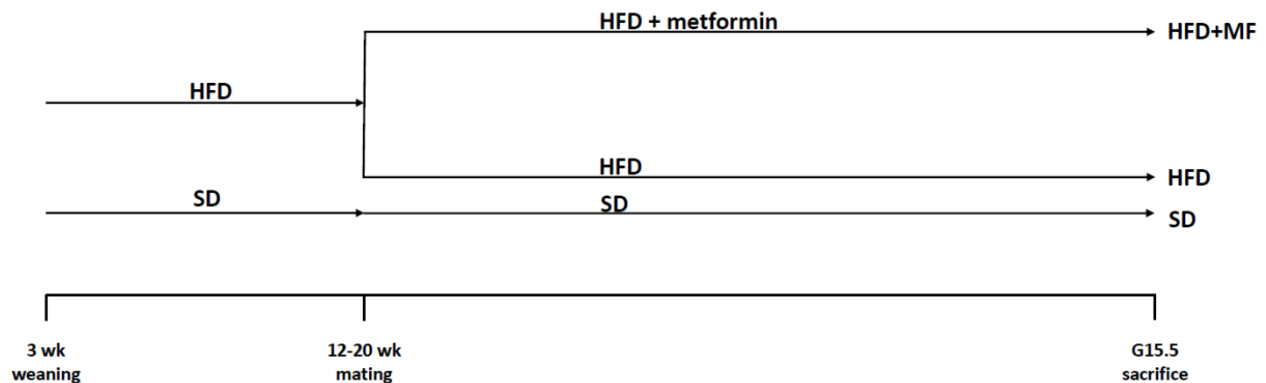

**Figure S1.** Schematic overview of the mouse groups used in this study. Female mice received either a SD or HFD after weaning until mating. After mating, the control group continued to receive the SD until the end of the experiment. The HFD group was randomly split in two subgroups after mating, while one subgroup continued to feed on HFD until sacrifice at G15.5 (HFD), and one subgroup received HFD plus metformin until G15.5 (HFD + MF). SD = standard diet; HFD = high fat diet; MF = metformin; G = gestational day; wk = week.

**Table S1.** Details on mouse diets used in this study. ME = metabolizable energy; SD = standard diet; HFD = high fat diet.

|                                | SD                      | HFD                      |
|--------------------------------|-------------------------|--------------------------|
| Company                        | Ssniff (Soest, Germany) | Altromin (Lage, Germany) |
| Catalog number                 | V1534 – R/M-Maintenance | C1057, modified          |
| Metabolizable energy [kcal/kg] | 3225                    | 5237                     |
| Fat [% of ME]                  | 9                       | 60                       |
| Protein [% of ME]              | 33                      | 16                       |
| Carbohydrates [% of ME]        | 58                      | 24                       |

Voßbrecher, Merlin D Kammerer, Angela Köninger, Alexandra Gellhaus, Marion Handwerk, Maria Wohlfarth, Dirk Gründemann, Eva Hucklenbruch-Rother, Jörg Dötsch, Sarah Appel

## Summary tables from proteomic screen of pgWAT at the middle of last trimester

Proteins named in the discussion are highlighted in each table.

**Table S2: Significantly and relevantly upregulated proteins in pgWAT at G15.5 in HFD vs SD.** 53 proteins are significantly (qvalue < 0.05) and relevantly (fold change > 1.5) upregulated in obese (HFD) compared to lean dams (SD). Protein ID, protein name, gene, q-value (p-value corrected for multiple testing), fold change and valid values of both groups (= number of samples in which a protein was detected) are shown. The table is sorted according to fold change. 5 samples were analyzed per group.

| Protein ID        | Protein name                                                  | Gene          | q-Value            | Fold change | Valid values HFD | Valid values SD |
|-------------------|---------------------------------------------------------------|---------------|--------------------|-------------|------------------|-----------------|
| <b>P27601</b>     | Guanine nucleotide-binding protein subunit alpha-13           | Gna13         | < 0,01             | 6,92        | 5                | 0               |
| <b>Q6PGH2</b>     | Hematological and neurological expressed 1-like protein       | Hn1l          | < 0,05             | 5,72        | 5                | 0               |
| <b>Q0PD20</b>     | Ras-related protein Rab-34                                    | Rab34         | < 0,01             | 5,04        | 5                | 0               |
| <b>A0A0R4J0F6</b> | Cyclin-G-associated kinase                                    | Gak           | < 0,0005           | 4,27        | 5                | 0               |
| <b>Q9WTQ5</b>     | A-kinase anchor protein 12                                    | Akap12        | < 0,01             | 4,23        | 5                | 5               |
| <b>Q9Z0F7</b>     | Gamma-synuclein                                               | Sncg          | < 0,05             | 4,03        | 5                | 5               |
| <b>P26645</b>     | Myristoylated alanine-rich C-kinase substrate                 | Marcks        | < 0,05             | 4,03        | 5                | 5               |
| <b>Q3THG9</b>     | Alanyl-tRNA editing protein Aarsd1                            | Aarsd1        | < 0,0005           | 3,88        | 5                | 0               |
| <b>Q8CG16</b>     | Complement C1r-A subcomponent                                 | C1ra          | < 0,05             | 3,83        | 5                | 0               |
| <b>Q6PE70</b>     | Integrin beta                                                 | Itgb5         | < 0,001            | 3,35        | 5                | 0               |
| <b>Q8K0C9</b>     | GDP-mannose 4,6 dehydratase                                   | Gmds          | < 0,05             | 3,27        | 5                | 0               |
| <b>E9PUM4</b>     | Talin-2                                                       | Tln2          | < 0,01             | 3,20        | 5                | 5               |
| <b>E9QA16</b>     | Caldesmon 1                                                   | Cald1         | < 0,05             | 2,98        | 5                | 5               |
| <b>Q8BH58</b>     | TIP41-like protein                                            | Tiprl         | < 0,05             | 2,90        | 5                | 0               |
| <b>P06728</b>     | <b>Apolipoprotein A-IV</b>                                    | <b>Apoa4</b>  | <b>&lt; 0,0005</b> | <b>2,73</b> | <b>5</b>         | <b>5</b>        |
| <b>Q3UH59</b>     | Myosin-10                                                     | Myh10         | < 0,05             | 2,69        | 5                | 5               |
| <b>O88492</b>     | Perilipin-4                                                   | Plin4         | < 0,05             | 2,61        | 5                | 5               |
| <b>P17439</b>     | Glucosylceramidase                                            | Gba           | < 0,01             | 2,49        | 5                | 0               |
| <b>Q9DCC5</b>     | Chromobox protein homolog 3                                   | Cbx3          | < 0,05             | 2,32        | 5                | 5               |
| <b>Q63918</b>     | Serum deprivation-response protein                            | Sdpr          | < 0,05             | 2,31        | 5                | 5               |
| <b>P10107</b>     | Annexin A1                                                    | Anxa1         | < 0,001            | 2,16        | 5                | 5               |
| <b>P63024</b>     | Vesicle-associated membrane protein 3                         | Vamp3         | < 0,05             | 2,15        | 5                | 5               |
| <b>B1AQF4</b>     | Dual specificity protein phosphatase 3                        | Dusp3         | < 0,05             | 2,13        | 5                | 5               |
| <b>Q9Z0P4</b>     | Paralemmin-1                                                  | Palm          | < 0,05             | 2,10        | 5                | 5               |
| <b>Q91VJ2</b>     | Protein kinase C delta-binding protein                        | Prkcdbp       | < 0,05             | 2,09        | 5                | 5               |
| <b>Q9DBX6</b>     | <b>Cytochrome P450 2S1</b>                                    | <b>Cyp2s1</b> | <b>&lt; 0,05</b>   | <b>2,09</b> | <b>5</b>         | <b>5</b>        |
| <b>Q00898</b>     | Alpha-1-antitrypsin 1-5                                       | Serpina1e     | < 0,05             | 2,05        | 5                | 5               |
| <b>P07356</b>     | Annexin A2                                                    | Anxa2         | < 0,01             | 2,04        | 5                | 5               |
| <b>Q61792</b>     | LIM and SH3 domain protein 1                                  | Lasp1         | < 0,05             | 2,04        | 5                | 5               |
| <b>Q8BGD9</b>     | Eukaryotic translation initiation factor 4B                   | Eif4b         | < 0,05             | 2,01        | 5                | 5               |
| <b>Q8BJW6</b>     | Eukaryotic translation initiation factor 2A                   | Eif2a         | < 0,05             | 1,98        | 5                | 5               |
| <b>P27546</b>     | Microtubule-associated protein 4                              | Map4          | < 0,05             | 1,92        | 5                | 5               |
| <b>O54724</b>     | Polymerase I and transcript release factor                    | Ptrf          | < 0,05             | 1,90        | 5                | 5               |
| <b>A0A0R4J034</b> | Pyridoxal-dependent decarboxylase domaincontaining protein 1  | Pdxdc1        | < 0,05             | 1,89        | 5                | 5               |
| <b>P31324</b>     | cAMP-dependent protein kinase type II-beta regulatory subunit | Prkar2b       | < 0,05             | 1,83        | 5                | 5               |
| <b>Q61739</b>     | Integrin alpha-6                                              | Itga6         | < 0,05             | 1,81        | 5                | 5               |
| <b>P48036</b>     | Annexin A5                                                    | Anxa5         | < 0,05             | 1,79        | 5                | 5               |

|               |                                                 |        |        |      |   |   |
|---------------|-------------------------------------------------|--------|--------|------|---|---|
| <b>Q78IS1</b> | Transmembrane emp24 domain-containing protein 3 | Tmed3  | < 0,05 | 1,75 | 5 | 5 |
| <b>E9Q8I9</b> | Protein furry homolog                           | Fry    | < 0,05 | 1,74 | 5 | 0 |
| <b>J3QNU6</b> | Beta-arrestin-1                                 | Arrb1  | < 0,05 | 1,73 | 5 | 5 |
| <b>Q8R2Y2</b> | Cell surface glycoprotein MUC18                 | Mcam   | < 0,05 | 1,70 | 5 | 5 |
| <b>F8VQJ3</b> | Laminin subunit gamma-1                         | Lamc1  | < 0,05 | 1,70 | 5 | 5 |
| <b>Q6IRU2</b> | Tropomyosin alpha-4 chain                       | Tpm4   | < 0,05 | 1,66 | 5 | 5 |
| <b>Q9JIW9</b> | Ras-related protein Ral-B                       | Ralb   | < 0,05 | 1,64 | 5 | 5 |
| <b>A2AVJ7</b> | Ribosome-binding protein 1                      | Rrbp1  | < 0,05 | 1,63 | 5 | 5 |
| <b>P20152</b> | Vimentin                                        | Vim    | < 0,05 | 1,60 | 5 | 5 |
| <b>F7AAP4</b> | Calcium-transporting ATPase                     | Atp2b4 | < 0,05 | 1,59 | 5 | 5 |
| <b>A3KGU7</b> | Spectrin alpha chain, non-erythrocytic 1        | Sptan1 | < 0,05 | 1,58 | 5 | 5 |
| <b>E9Q616</b> | AHNAK nucleoprotein (desmoyokin)                | Ahnak  | < 0,05 | 1,54 | 5 | 5 |
| <b>Q62261</b> | Spectrin beta chain, non-erythrocytic 1         | Sptbn1 | < 0,05 | 1,54 | 5 | 5 |
| <b>P47955</b> | 60S acidic ribosomal protein P1                 | Rplp1  | < 0,05 | 1,54 | 5 | 5 |
| <b>Q9CWF2</b> | Tubulin beta-2B chain                           | Tubb2b | < 0,05 | 1,53 | 5 | 5 |
| <b>F8WIT2</b> | Annexin                                         | Anxa6  | < 0,05 | 1,53 | 5 | 5 |

**Table S3: Significantly and relevantly downregulated proteins in pgWAT at G15.5 in HFD vs SD.** 143 proteins are significantly (q-value < 0.05) and relevantly (fold change > 1.5) downregulated in obese (HFD) compared to lean dams (SD). Protein ID, protein name, gene, q-value (p-value corrected for multiple testing), fold change and valid values of both groups (= number of samples in which a protein was detected) are shown. The table is sorted according to fold change. 5 samples were analyzed per group.

| Protein ID        | Protein name                                                                          | Gene         | q-Value            | Fold change  | Valid values HFD | Valid values SD |
|-------------------|---------------------------------------------------------------------------------------|--------------|--------------------|--------------|------------------|-----------------|
| <b>Q62264</b>     | Thyroid hormone-inducible hepatic protein                                             | Thrsp        | < 0,01             | -12,47       | 5                | 5               |
| <b>Q9JK42</b>     | <b>[Pyruvate dehydrogenase (acetyl-transferring)] kinase isozyme 2, mitochondrial</b> | <b>Pdk2</b>  | <b>&lt; 0,0005</b> | <b>-8,76</b> | <b>0</b>         | <b>5</b>        |
| <b>Q3V117</b>     | ATP-citrate synthase                                                                  | Acly         | < 0,0005           | -8,52        | 5                | 5               |
| <b>F8VPN4</b>     | 4-alpha-glucanotransferase                                                            | Agl          | < 0,05             | -8,32        | 5                | 5               |
| <b>Q5SWU9</b>     | Acetyl-CoA carboxylase 1                                                              | Acaca        | < 0,001            | -7,32        | 5                | 5               |
| <b>Q80Y98</b>     | Phospholipase DDHD2                                                                   | Ddhd2        | < 0,01             | -6,98        | 5                | 5               |
| <b>Q99J39</b>     | <b>Malonyl-CoA decarboxylase, mitochondrial</b>                                       | <b>Mlycd</b> | <b>&lt; 0,01</b>   | <b>-6,34</b> | <b>0</b>         | <b>5</b>        |
| <b>Q8R2U6</b>     | Diphosphoinositol polyphosphate phosphohydrolase 2                                    | Nudt4        | < 0,05             | -5,36        | 0                | 5               |
| <b>Q3TJZ6</b>     | Protein FAM98A                                                                        | Fam98a       | < 0,05             | -5,17        | 0                | 5               |
| <b>A2AQN4</b>     | Acetyl-coenzyme A synthetase, cytoplasmic                                             | Acss2        | < 0,01             | -5,15        | 5                | 5               |
| <b>A0A1B0GT63</b> | Transmembrane protein 143                                                             | Tmem143      | < 0,01             | -5,09        | 0                | 5               |
| <b>Q9CQ20</b>     | Mid1-interacting protein 1                                                            | Mid1ip1      | < 0,05             | -4,85        | 0                | 5               |
| <b>Q8BGS7</b>     | Choline/ethanolaminephosphotransferase 1                                              | Cept1        | < 0,05             | -4,81        | 0                | 5               |
| <b>P19096</b>     | Fatty acid synthase                                                                   | Fasn         | < 0,0005           | -4,64        | 5                | 5               |
| <b>Q64521</b>     | Glycerol-3-phosphate dehydrogenase, mitochondrial                                     | Gpd2         | < 0,0005           | -4,58        | 5                | 5               |
| <b>Q9CXI0</b>     | 2-methoxy-6-polyprenyl-1,4-benzoquinol methylase, mitochondrial                       | Coq5         | < 0,05             | -4,29        | 0                | 5               |
| <b>A2AQZ2</b>     | Phytanoyl-CoA dioxygenase domain-containing protein 1                                 | Phyhd1       | < 0,05             | -4,15        | 0                | 5               |
| <b>Q9CR26</b>     | Vacuolar protein sorting-associated protein VTA1 homolog                              | Vta1         | < 0,05             | -4,05        | 0                | 5               |
| <b>B7ZMP1</b>     | Probable Xaa-Pro aminopeptidase 3                                                     | Xpnpep3      | < 0,05             | -3,93        | 0                | 5               |
| <b>G3UZY2</b>     | Thioredoxin, mitochondrial                                                            | Txn2         | < 0,01             | -3,88        | 0                | 5               |
| <b>Q8K0Z7</b>     | Translational activator of cytochrome c oxidase 1                                     | Taco1        | < 0,0005           | -3,83        | 0                | 5               |
| <b>P06801</b>     | NADP-dependent malic enzyme                                                           | Me1          | < 0,01             | -3,78        | 5                | 5               |

|                   |                                                                             |          |          |       |   |   |
|-------------------|-----------------------------------------------------------------------------|----------|----------|-------|---|---|
| <b>D3Z4P2</b>     | VIP36-like protein                                                          | Lman2l   | < 0,01   | -3,47 | 0 | 5 |
| <b>Q8BHE8</b>     | Uncharacterized protein C2orf47 homolog, mitochondrial                      | Maip1    | < 0,01   | -3,41 | 0 | 5 |
| <b>P70444</b>     | BH3-interacting domain death agonist                                        | Bid      | < 0,01   | -3,25 | 0 | 5 |
| <b>Q9D2R0</b>     | Acetoacetyl-CoA synthetase                                                  | Aacs     | < 0,05   | -3,17 | 5 | 5 |
| <b>Q99LB7</b>     | Sarcosine dehydrogenase, mitochondrial                                      | Sardh    | < 0,05   | -3,17 | 5 | 5 |
| <b>O08528</b>     | Hexokinase-2                                                                | Hk2      | < 0,05   | -3,07 | 5 | 5 |
| <b>P13516</b>     | Acyl-CoA desaturase 1                                                       | Scd1     | < 0,01   | -3,07 | 5 | 5 |
| <b>A2AKN9</b>     | Major urinary protein 6                                                     | Mup4     | < 0,01   | -3,04 | 5 | 5 |
| <b>P52196</b>     | Thiosulfate sulfurtransferase                                               | Tst      | < 0,0005 | -2,99 | 5 | 5 |
| <b>Q9CZB0</b>     | Succinate dehydrogenase cytochrome b560 subunit, mitochondrial              | Sdhc     | < 0,05   | -2,97 | 5 | 5 |
| <b>A0A1L1SRX2</b> | AMP deaminase 3                                                             | Ampd3    | < 0,05   | -2,93 | 5 | 5 |
| <b>Q8JZU2</b>     | Tricarboxylate transport protein, mitochondrial                             | Slc25a1  | < 0,01   | -2,92 | 5 | 5 |
| <b>Q8VHY0</b>     | Chondroitin sulfate proteoglycan 4                                          | Cspg4    | < 0,05   | -2,90 | 5 | 5 |
| <b>A0A0R4J0L6</b> | 28S ribosomal protein S35, mitochondrial                                    | Mrps35   | < 0,05   | -2,88 | 0 | 5 |
| <b>A2A848</b>     | Peroxisomal acyl-coenzyme A oxidase 1                                       | Acox1    | < 0,05   | -2,87 | 5 | 5 |
| <b>E9PXY1</b>     | Cullin-4B                                                                   | Cul4b    | < 0,05   | -2,80 | 0 | 5 |
| <b>A0A140T8R8</b> | DCN1-like protein                                                           | Dcun1d1  | < 0,05   | -2,76 | 0 | 5 |
| <b>Q8R086</b>     | Sulfite oxidase, mitochondrial                                              | Suox     | < 0,0005 | -2,72 | 5 | 5 |
| <b>Q9D024</b>     | Coiled-coil domain-containing protein 47                                    | Ccdc47   | < 0,05   | -2,71 | 5 | 5 |
| <b>Q9D6M3</b>     | Mitochondrial glutamate carrier 1                                           | Slc25a22 | < 0,001  | -2,69 | 5 | 5 |
| <b>Q922B1</b>     | O-acetyl-ADP-ribose deacetylase MACROD1                                     | MacroD1  | < 0,05   | -2,68 | 5 | 5 |
| <b>P30115</b>     | Glutathione S-transferase A3                                                | Gsta3    | < 0,05   | -2,67 | 5 | 5 |
| <b>P40142</b>     | Transketolase                                                               | Tkt      | < 0,05   | -2,66 | 5 | 5 |
| <b>Q9DCW5</b>     | Cytochrome c oxidase subunit 6A, mitochondrial                              | Cox6a1   | < 0,05   | -2,65 | 5 | 5 |
| <b>S4R225</b>     | WD repeat-containing protein 13                                             | Wdr13    | < 0,05   | -2,64 | 0 | 5 |
| <b>Q8K3J1</b>     | NADH dehydrogenase [ubiquinone] iron-sulfur protein 8, mitochondrial        | Ndufs8   | < 0,05   | -2,64 | 5 | 5 |
| <b>Q8K411</b>     | Presequence protease, mitochondrial                                         | Pitrm1   | < 0,05   | -2,63 | 5 | 5 |
| <b>Q9D6Y9</b>     | 1,4-alpha-glucan-branching enzyme                                           | Gbe1     | < 0,0005 | -2,60 | 5 | 5 |
| <b>Q9D023</b>     | Mitochondrial pyruvate carrier 2                                            | Mpc2     | < 0,05   | -2,60 | 5 | 5 |
| <b>Q8CFR5</b>     | Dystrobrevin                                                                | Dtna     | < 0,05   | -2,59 | 0 | 5 |
| <b>Q99LY9</b>     | NADH dehydrogenase [ubiquinone] iron-sulfur protein 5                       | Ndufs5   | < 0,05   | -2,59 | 5 | 5 |
| <b>A0A0R3P9C8</b> | NADH dehydrogenase [ubiquinone] 1 alpha subcomplex subunit 9, mitochondrial | Ndufa9   | < 0,05   | -2,59 | 5 | 5 |
| <b>Q9CYV5</b>     | Transmembrane protein 135                                                   | Tmem135  | < 0,01   | -2,58 | 0 | 5 |
| <b>A0A0B4J1G1</b> | Low affinity immunoglobulin gamma Fc region receptor II                     | Fcgr2b   | < 0,05   | -2,56 | 0 | 5 |
| <b>Q3URE1</b>     | Acyl-CoA synthetase family member 3, mitochondrial                          | Acsf3    | < 0,05   | -2,56 | 5 | 5 |
| <b>J3QMN4</b>     | Thioredoxin reductase 2, mitochondrial                                      | Txnrd2   | < 0,01   | -2,55 | 5 | 5 |
| <b>A0A0R4J023</b> | Methylglutaconyl-CoA hydratase, mitochondrial                               | Auh      | < 0,05   | -2,52 | 5 | 5 |
| <b>Q9QZA0</b>     | Carbonic anhydrase 5B, mitochondrial                                        | Ca5b     | < 0,01   | -2,48 | 5 | 5 |
| <b>Q8CAY6</b>     | Acetyl-CoA acetyltransferase, cytosolic                                     | Acat2    | < 0,05   | -2,47 | 5 | 5 |
| <b>Q8R164</b>     | Valacyclovir hydrolase                                                      | Bphl     | < 0,05   | -2,46 | 5 | 5 |
| <b>Q9D0I4</b>     | Syntaxin-17                                                                 | Stx17    | < 0,05   | -2,44 | 0 | 5 |
| <b>O70589</b>     | Peripheral plasma membrane protein CASK                                     | Cask     | < 0,05   | -2,43 | 0 | 5 |
| <b>Q9CPR5</b>     | 39S ribosomal protein L15, mitochondrial                                    | Mrpl15   | < 0,05   | -2,42 | 0 | 5 |
| <b>Q9CQZ5</b>     | NADH dehydrogenase [ubiquinone] 1 alpha subcomplex subunit 6                | Ndufa6   | < 0,01   | -2,39 | 5 | 5 |

|                   |                                                                                |                   |                  |              |          |          |
|-------------------|--------------------------------------------------------------------------------|-------------------|------------------|--------------|----------|----------|
| <b>E9QLB2</b>     | Lysophospholipase-like protein 1                                               | Lyplal1           | < 0,05           | -2,34        | 5        | 5        |
| <b>Q9DBL1</b>     | Short/branched chain specific acyl-CoA dehydrogenase, mitochondrial            | Acadsb            | < 0,01           | -2,33        | 5        | 5        |
| <b>Q9CPQ1</b>     | Cytochrome c oxidase subunit 6C                                                | Cox6c             | < 0,05           | -2,30        | 5        | 5        |
| <b>E9QNL5</b>     | Sulfotransferase                                                               | Sult1a1           | < 0,05           | -2,29        | 5        | 5        |
| <b>Q91VM9</b>     | Inorganic pyrophosphatase 2, mitochondrial                                     | Ppa2              | < 0,05           | -2,28        | 5        | 5        |
| <b>Q9CR62</b>     | Mitochondrial 2-oxoglutarate/malate carrier protein                            | Slc25a11          | < 0,0005         | -2,27        | 5        | 5        |
| <b>Q8BWM0</b>     | Prostaglandin E synthase 2                                                     | Ptges2            | < 0,01           | -2,27        | 5        | 5        |
| <b>G5E8R3</b>     | Pyruvate carboxylase                                                           | Pcx               | < 0,05           | -2,25        | 5        | 5        |
| <b>F8WIU1</b>     | UPF0687 protein C20orf27 homolog                                               | 1700037<br>H04Rik | < 0,05           | -2,25        | 5        | 5        |
| <b>Q9CQC7</b>     | NADH dehydrogenase [ubiquinone] 1 beta subcomplex subunit 4                    | Ndufb4            | < 0,01           | -2,25        | 5        | 5        |
| <b>Q8K0C4</b>     | Lanosterol 14-alpha demethylase                                                | Cyp51a1           | < 0,05           | -2,23        | 0        | 5        |
| <b>Q505D7</b>     | <b>Optic atrophy 3 protein homolog</b>                                         | <b>Opa3</b>       | <b>&lt; 0,05</b> | <b>-2,20</b> | <b>0</b> | <b>5</b> |
| <b>Q9ET01</b>     | Glycogen phosphorylase, liver form                                             | Pygl              | < 0,01           | -2,17        | 5        | 5        |
| <b>A0A0R4J1R7</b> | Pterin-4-alpha-carbinolamine dehydratase 2                                     | Pcbd2             | < 0,05           | -2,17        | 5        | 5        |
| <b>P0DN34</b>     | NADH dehydrogenase [ubiquinone] 1 beta subcomplex subunit 1                    | Ndufb1            | < 0,01           | -2,14        | 5        | 5        |
| <b>D3YUM1</b>     | NADH dehydrogenase [ubiquinone] flavoprotein 1, mitochondrial                  | Ndufv1            | < 0,05           | -2,10        | 5        | 5        |
| <b>O88696</b>     | ATP-dependent Clp protease proteolytic subunit, mitochondrial                  | Clpp              | < 0,01           | -2,10        | 5        | 5        |
| <b>Q9ERS2</b>     | NADH dehydrogenase [ubiquinone] 1 alpha subcomplex subunit 13                  | Ndufa13           | < 0,05           | -2,10        | 5        | 5        |
| <b>Q99JR6</b>     | Nicotinamide/nicotinic acid mononucleotide adenylyltransferase 3               | Nmnat3            | < 0,05           | -2,09        | 0        | 5        |
| <b>Q9D7J9</b>     | Enoyl-CoA hydratase domain-containing protein 3, mitochondrial                 | Echdc3            | < 0,01           | -2,08        | 5        | 5        |
| <b>Q99LS3</b>     | Phosphoserine phosphatase                                                      | Psph              | < 0,05           | -2,07        | 5        | 5        |
| <b>Q91WD5</b>     | NADH dehydrogenase [ubiquinone] iron-sulfur protein 2, mitochondrial           | Ndufs2            | < 0,05           | -2,07        | 5        | 5        |
| <b>Q9CQQ7</b>     | ATP synthase F(0) complex subunit B1, mitochondrial                            | Atp5f1            | < 0,01           | -2,06        | 5        | 5        |
| <b>A0A1B0GT92</b> | Glycogen [starch] synthase, muscle                                             | Gys1              | < 0,05           | -2,03        | 5        | 5        |
| <b>Q99LC3</b>     | NADH dehydrogenase [ubiquinone] 1 alpha subcomplex subunit 10, mitochondrial   | Ndufa10           | < 0,0005         | -2,02        | 5        | 5        |
| <b>Q14DH7</b>     | Acyl-CoA synthetase short-chain family member 3, mitochondrial                 | Acss3             | < 0,05           | -2,01        | 5        | 5        |
| <b>P56135</b>     | ATP synthase subunit f, mitochondrial                                          | Atp5j2            | < 0,05           | -2,00        | 5        | 5        |
| <b>Q9CQJ8</b>     | NADH dehydrogenase [ubiquinone] 1 beta subcomplex subunit 9                    | Ndufb9            | < 0,05           | -2,00        | 5        | 5        |
| <b>Q7TMG8</b>     | Protein NipSnap homolog 2                                                      | Gbas              | < 0,01           | -1,99        | 5        | 5        |
| <b>P00405</b>     | Cytochrome c oxidase subunit 2                                                 | mt-Co2            | < 0,05           | -1,99        | 5        | 5        |
| <b>Q99P31</b>     | Hsp70-binding protein 1                                                        | Hspbp1            | < 0,05           | -1,93        | 0        | 5        |
| <b>Q91ZJ5</b>     | UTP--glucose-1-phosphate uridylyltransferase                                   | Ugp2              | < 0,05           | -1,91        | 5        | 5        |
| <b>Q8CHT0</b>     | Delta-1-pyrroline-5-carboxylate dehydrogenase, mitochondrial                   | Aldh4a1           | < 0,05           | -1,91        | 5        | 5        |
| <b>A0A0A0MQ68</b> | Glutaryl-CoA dehydrogenase, mitochondrial                                      | Gcdh              | < 0,05           | -1,91        | 5        | 5        |
| <b>Q9DBL7</b>     | Bifunctional coenzyme A synthase                                               | Coasy             | < 0,05           | -1,90        | 5        | 5        |
| <b>P35486</b>     | Pyruvate dehydrogenase E1 component subunit alpha, somatic form, mitochondrial | Pdha1             | < 0,05           | -1,88        | 5        | 5        |
| <b>Q9DCT2</b>     | NADH dehydrogenase [ubiquinone] iron-sulfur protein 3, mitochondrial           | Ndufs3            | < 0,05           | -1,87        | 5        | 5        |

|               |                                                                          |           |         |       |   |   |
|---------------|--------------------------------------------------------------------------|-----------|---------|-------|---|---|
| <b>P03911</b> | NADH-ubiquinone oxidoreductase chain 4                                   | mt-Nd4    | < 0,05  | -1,87 | 5 | 5 |
| <b>P52480</b> | Pyruvate kinase PKM                                                      | Pkm       | < 0,05  | -1,86 | 5 | 5 |
| <b>Q9QZD8</b> | Mitochondrial dicarboxylate carrier                                      | Slc25a10  | < 0,05  | -1,85 | 5 | 5 |
| <b>Q8BGC4</b> | Zinc-binding alcohol dehydrogenase domaincontaining protein 2            | Zadh2     | < 0,05  | -1,82 | 5 | 5 |
| <b>Q91VT4</b> | Carbonyl reductase family member 4                                       | Cbr4      | < 0,05  | -1,82 | 5 | 5 |
| <b>Q8CG76</b> | Aflatoxin B1 aldehyde reductase member 2                                 | Akr7a2    | < 0,05  | -1,81 | 5 | 5 |
| <b>P97372</b> | Proteasome activator complex subunit 2                                   | Psme2     | < 0,05  | -1,80 | 5 | 5 |
| <b>P03888</b> | NADH-ubiquinone oxidoreductase chain 1                                   | mt-Nd1    | < 0,05  | -1,80 | 5 | 5 |
| <b>Q9QYR9</b> | Acyl-coenzyme A thioesterase 2, mitochondrial                            | Acot2     | < 0,05  | -1,80 | 5 | 5 |
| <b>Q9D0M3</b> | Cytochrome c1, heme protein, mitochondrial                               | Cyc1      | < 0,01  | -1,79 | 5 | 5 |
| <b>Q9DC61</b> | Mitochondrial-processing peptidase subunit alpha                         | Pmpca     | < 0,05  | -1,79 | 5 | 5 |
| <b>P14142</b> | Solute carrier family 2, facilitated glucose transporter member 4        | Slc2a4    | < 0,05  | -1,79 | 5 | 5 |
| <b>P05202</b> | Aspartate aminotransferase, mitochondrial                                | Got2      | < 0,05  | -1,78 | 5 | 5 |
| <b>Q9DCJ5</b> | NADH dehydrogenase [ubiquinone] 1 alpha subcomplex subunit 8             | Ndufa8    | < 0,05  | -1,77 | 5 | 5 |
| <b>Q9DB77</b> | Cytochrome b-c1 complex subunit 2, mitochondrial                         | Uqcrc2    | < 0,01  | -1,77 | 5 | 5 |
| <b>Q92511</b> | ATPase family AAA domain-containing protein 3                            | Atad3     | < 0,05  | -1,76 | 5 | 5 |
| <b>Q8CGK3</b> | Lon protease homolog, mitochondrial                                      | Lonp1     | < 0,05  | -1,74 | 5 | 5 |
| <b>Q8K2B3</b> | Succinate dehydrogenase [ubiquinone] flavoprotein subunit, mitochondrial | Sdha      | < 0,01  | -1,72 | 5 | 5 |
| <b>P06745</b> | Glucose-6-phosphate isomerase                                            | Gpi       | < 0,01  | -1,72 | 5 | 5 |
| <b>Q3UW66</b> | Sulfurtransferase                                                        | Mpst      | < 0,05  | -1,72 | 5 | 5 |
| <b>P55302</b> | Alpha-2-macroglobulin receptor-associated protein                        | Lrpap1    | < 0,05  | -1,70 | 5 | 5 |
| <b>P12382</b> | ATP-dependent 6-phosphofructokinase, liver type                          | Pfkl      | < 0,01  | -1,70 | 5 | 5 |
| <b>Q6PB66</b> | Leucine-rich PPR motif-containing protein, mitochondrial                 | Lrprrc    | < 0,05  | -1,67 | 5 | 5 |
| <b>Q9R1J0</b> | Sterol-4-alpha-carboxylate 3-dehydrogenase, decarboxylating              | Nsdhl     | < 0,05  | -1,67 | 5 | 5 |
| <b>Q9D172</b> | ES1 protein homolog, mitochondrial                                       | D10Jhu81e | < 0,05  | -1,64 | 5 | 5 |
| <b>Q9DAR7</b> | m7GpppX diphosphatase                                                    | Dcps      | < 0,01  | -1,63 | 5 | 5 |
| <b>P47738</b> | Aldehyde dehydrogenase, mitochondrial                                    | Aldh2     | < 0,05  | -1,62 | 5 | 5 |
| <b>Q8BQ47</b> | Protein canopy homolog 4                                                 | Cnpy4     | < 0,001 | -1,62 | 5 | 5 |
| <b>Q9JMH6</b> | Thioredoxin reductase 1, cytoplasmic                                     | Txnrd1    | < 0,01  | -1,60 | 5 | 5 |
| <b>Q9D1D4</b> | Transmembrane emp24 domain-containing protein 10                         | Tmed10    | < 0,05  | -1,60 | 5 | 5 |
| <b>Q9D6J6</b> | NADH dehydrogenase [ubiquinone] flavoprotein 2, mitochondrial            | Ndufv2    | < 0,05  | -1,60 | 5 | 5 |
| <b>O08749</b> | Dihydrolipoyl dehydrogenase, mitochondrial                               | Dld       | < 0,05  | -1,59 | 5 | 5 |
| <b>P63325</b> | 40S ribosomal protein S10                                                | Rps10     | < 0,05  | -1,58 | 5 | 5 |
| <b>Q8BGH2</b> | Sorting and assembly machinery component 50 homolog                      | Samm50    | < 0,05  | -1,58 | 5 | 5 |
| <b>P15105</b> | Glutamine synthetase                                                     | Glul      | < 0,05  | -1,58 | 5 | 5 |
| <b>Q03958</b> | Prefoldin subunit 6                                                      | Pfdn6     | < 0,05  | -1,56 | 5 | 5 |
| <b>Q8R0Y6</b> | Cytosolic 10-formyltetrahydrofolate dehydrogenase                        | Aldh1l1   | < 0,05  | -1,55 | 5 | 5 |
| <b>Q9CY27</b> | Very-long-chain enoyl-CoA reductase                                      | Tecr      | < 0,05  | -1,54 | 5 | 5 |
| <b>P28063</b> | Proteasome subunit beta type-8                                           | Psmb8     | < 0,05  | -1,52 | 5 | 5 |
| <b>Q9R0X4</b> | Acyl-coenzyme A thioesterase 9, mitochondrial                            | Acot9     | < 0,05  | -1,52 | 5 | 5 |

**Table S4: Significantly and relevantly upregulated proteins in pgWAT at G15.5 in HFD+MF vs HFD.** 58 proteins are significantly (q-value < 0.05) and relevantly (fold change > 1.5) upregulated in obese dams treated with metformin during pregnancy (HFD+MF) compared to obese dams (HFD). Protein ID, protein name, gene, q-value (p-value corrected for multiple testing), fold change and valid values of both groups (= number of samples in which a protein was detected) are shown. The table is sorted according to fold change. 4 HFD+MF samples and 5 HFD samples were analyzed.

| Protein ID | Protein name                                                                          | Gene         | q-Value          | Fold change | Valid values HFD+MF | Valid values HFD |
|------------|---------------------------------------------------------------------------------------|--------------|------------------|-------------|---------------------|------------------|
| S4R211     | Serine-rich coiled-coil domain-containing protein 2                                   | Ccser2       | < 0,05           | 13,01       | 4                   | 0                |
| Q9Z0Y1     | Dynactin subunit 3                                                                    | Dctn3        | < 0,01           | 8,53        | 4                   | 0                |
| Q61555     | Fibrillin-2                                                                           | Fbn2         | < 0,05           | 8,00        | 4                   | 0                |
| B1AZ15     | Cordon-bleu protein-like 1                                                            | Cobll1       | < 0,05           | 7,94        | 4                   | 0                |
| Q9CQR4     | Acyl-coenzyme A thioesterase 13                                                       | Acot13       | < 0,05           | 7,46        | 4                   | 0                |
| Q99J39     | <b>Malonyl-CoA decarboxylase, mitochondrial</b>                                       | <b>Mlycd</b> | <b>&lt; 0,05</b> | <b>7,19</b> | <b>4</b>            | <b>0</b>         |
| Q8K019     | Bcl-2-associated transcription factor 1                                               | Bclaf1       | < 0,05           | 5,71        | 4                   | 0                |
| Q8K0D5     | Elongation factor G, mitochondrial                                                    | Gfm1         | < 0,05           | 4,87        | 4                   | 0                |
| D3YTQ3     | Heterogeneous nuclear ribonucleoprotein D-like                                        | Hnrnpdl      | < 0,05           | 4,80        | 4                   | 0                |
| Q99JC1     | Ig lambda-2 chain C region                                                            | Iglc2        | < 0,05           | 4,73        | 4                   | 0                |
| Q9QUT0     | Ammonium transporter Rh type A                                                        | Rhag         | < 0,05           | 4,69        | 4                   | 0                |
| Q59IW6     | ABI gene family, member 3 (NESH)-binding protein                                      | Abi3bp       | < 0,05           | 4,44        | 4                   | 0                |
| Q9JK42     | <b>[Pyruvate dehydrogenase (acetyl-transferring)] kinase isozyme 2, mitochondrial</b> | <b>Pdk2</b>  | <b>&lt; 0,05</b> | <b>4,35</b> | <b>4</b>            | <b>0</b>         |
| Q9D0R8     | Protein LSM12 homolog                                                                 | Lsm12        | < 0,05           | 4,35        | 4                   | 0                |
| Q6GQT1     | Alpha-2-macroglobulin-P                                                               | A2m          | < 0,05           | 4,29        | 4                   | 5                |
| G3X9Q2     | Guanine nucleotide-binding protein subunit gamma                                      | Gng7         | < 0,05           | 4,29        | 4                   | 0                |
| P52623     | Uridine-cytidine kinase 1                                                             | Uck1         | < 0,05           | 3,87        | 4                   | 0                |
| A0A0R4J1Z3 | Transmembrane protein 33                                                              | Tmem33       | < 0,05           | 3,86        | 4                   | 0                |
| Q9CPU2     | NADH dehydrogenase [ubiquinone] 1 beta subcomplex subunit 2, mitochondrial            | Ndufb2       | < 0,05           | 3,71        | 4                   | 0                |
| Q61584     | Fragile X mental retardation syndrome-related protein 1                               | Fxr1         | < 0,05           | 3,57        | 4                   | 0                |
| Q569Z5     | Probable ATP-dependent RNA helicase DDX46                                             | Ddx46        | < 0,05           | 3,55        | 4                   | 0                |
| B1AUB9     | Nuclear factor 1                                                                      | Nfia         | < 0,05           | 3,48        | 4                   | 0                |
| A0A0G2JER9 | DnaJ homolog subfamily B member 6                                                     | Dnajb6       | < 0,05           | 3,36        | 4                   | 0                |
| Q8CC86     | Nicotinate phosphoribosyltransferase                                                  | Naprt        | < 0,05           | 3,35        | 4                   | 0                |
| Q9D020     | Cytosolic 5-nucleotidase 3A                                                           | Nt5c3a       | < 0,05           | 3,34        | 4                   | 0                |
| F6RJ39     | Apoptotic chromatin condensation inducer in the nucleus                               | Acin1        | < 0,05           | 3,34        | 4                   | 0                |
| H3BL37     | Treacle protein                                                                       | Tcof1        | < 0,05           | 3,30        | 4                   | 0                |
| Q3UE37     | Ubiquitin-conjugating enzyme E2 Z                                                     | Ube2z        | < 0,05           | 3,21        | 4                   | 0                |
| A0A0R4J1W7 | Cell division cycle protein 23 homolog                                                | Cdc23        | < 0,05           | 3,08        | 4                   | 0                |
| Q9JIZ9     | Phospholipid scramblase 3                                                             | Plscr3       | < 0,05           | 3,08        | 4                   | 0                |
| Q3U422     | NADH dehydrogenase [ubiquinone] flavoprotein 3, mitochondrial                         | Ndufv3       | < 0,05           | 3,04        | 4                   | 5                |
| Q9D289     | Trafficking protein particle complex subunit 6B                                       | Trappc6b     | < 0,05           | 2,88        | 4                   | 5                |
| D3Z2Z1     | CAP-Gly domain-containing linker protein 1                                            | Clip1        | < 0,05           | 2,69        | 4                   | 0                |
| Q8VI75     | Importin-4                                                                            | Ipo4         | < 0,05           | 2,69        | 4                   | 5                |
| Q9CPU4     | Microsomal glutathione S-transferase 3                                                | Mgst3        | < 0,05           | 2,66        | 4                   | 5                |

|                   |                                                             |                  |                  |             |          |          |
|-------------------|-------------------------------------------------------------|------------------|------------------|-------------|----------|----------|
| <b>Q8C570</b>     | mRNA export factor                                          | Rae1             | < 0,05           | 2,40        | 4        | 0        |
| <b>Q3UID0</b>     | SWI/SNF complex subunit SMARCC2                             | Smarcc2          | < 0,05           | 2,39        | 4        | 5        |
| <b>Q91V35</b>     | Receptor-type tyrosine-protein phosphatase                  | Ptptra           | < 0,05           | 2,38        | 4        | 0        |
| <b>D3Z7P3</b>     | Glutaminase kidney isoform, mitochondrial                   | Gls              | < 0,05           | 2,31        | 4        | 5        |
| <b>A0A0R4J0X5</b> | <b>Alpha-1-antitrypsin 1-3</b>                              | <b>Serpina1c</b> | <b>&lt; 0,05</b> | <b>2,25</b> | <b>4</b> | <b>5</b> |
| <b>P30355</b>     | Arachidonate 5-lipoxygenase-activating protein              | Alox5ap          | < 0,05           | 2,20        | 4        | 0        |
| <b>A2AEM2</b>     | Chloride channel CLIC-like protein 1                        | Clcc1            | < 0,05           | 2,19        | 4        | 0        |
| <b>Q91VS7</b>     | Microsomal glutathione S-transferase 1                      | Mgst1            | < 0,05           | 2,11        | 4        | 5        |
| <b>P22599</b>     | <b>Alpha-1-antitrypsin 1-2</b>                              | <b>Serpina1b</b> | <b>&lt; 0,05</b> | <b>2,05</b> | <b>4</b> | <b>5</b> |
| <b>P06728</b>     | <b>Apolipoprotein A-IV</b>                                  | <b>Apoa4</b>     | <b>&lt; 0,05</b> | <b>1,91</b> | <b>4</b> | <b>5</b> |
| <b>A0A0R4J170</b> | Transcription activator BRG1                                | Smarca4          | < 0,05           | 1,86        | 4        | 0        |
| <b>Q3UIA2</b>     | Rho GTPase-activating protein 17                            | Arhgap17         | < 0,05           | 1,85        | 4        | 5        |
| <b>Q99LC5</b>     | Electron transfer flavoprotein subunit alpha, mitochondrial | Etfa             | < 0,05           | 1,79        | 4        | 5        |
| <b>Q9Z0U1</b>     | Tight junction protein ZO-2                                 | Tjp2             | < 0,05           | 1,78        | 4        | 0        |
| <b>Q505D7</b>     | <b>Optic atrophy 3 protein homolog</b>                      | <b>Opa3</b>      | <b>&lt; 0,05</b> | <b>1,71</b> | <b>4</b> | <b>0</b> |
| <b>Q9Z204</b>     | Heterogeneous nuclear ribonucleoproteins C1/C2              | Hnrnpc           | < 0,05           | 1,69        | 4        | 5        |
| <b>Q91XD7</b>     | Cysteine-rich with EGF-like domain protein 1                | Creld1           | < 0,05           | 1,64        | 4        | 5        |
| <b>Q9DB20</b>     | ATP synthase subunit O, mitochondrial                       | Atp5o            | < 0,05           | 1,61        | 4        | 5        |
| <b>Q9QYJ0</b>     | DnaJ homolog subfamily A member 2                           | Dnaja2           | < 0,05           | 1,61        | 4        | 5        |
| <b>P16858</b>     | <b>Glyceraldehyde-3-phosphate dehydrogenase</b>             | <b>Gapdh</b>     | <b>&lt; 0,05</b> | <b>1,58</b> | <b>4</b> | <b>5</b> |
| <b>P21619</b>     | Lamin-B2                                                    | Lmnb2            | < 0,05           | 1,56        | 4        | 5        |
| <b>P54822</b>     | Adenylosuccinate lyase                                      | Adsl             | < 0,05           | 1,54        | 4        | 5        |
| <b>Q62465</b>     | Synaptic vesicle membrane protein VAT-1 homolog             | Vat1             | < 0,01           | 1,53        | 4        | 5        |

**Table S5: Significantly and relevantly downregulated proteins in pgWAT at G15.5 in HFD+MF vs HFD.** 45 proteins are significantly (q-value < 0.05) and relevantly (fold change > 1.5) downregulated in obese dams treated with metformin during pregnancy (HFD+MF) compared to obese dams (HFD). Protein ID, protein name, gene, q-value (p-value corrected for multiple testing), fold change and valid values of both groups (= number of samples in which a protein was detected) are shown. The table is sorted according to fold change. 4 HFD+MF samples and 5 HFD samples were analyzed.

| Protein ID        | Protein name                                | Gene          | q-Value          | Fold change   | Valid values HFD+MF | Valid values HFD |
|-------------------|---------------------------------------------|---------------|------------------|---------------|---------------------|------------------|
| <b>P20065</b>     | Thymosin beta-4                             | Tmsb4x        | < 0,05           | -33,30        | 0                   | 5                |
| <b>A0A0U1RNP7</b> | <b>Perilipin-1</b>                          | <b>Plin1</b>  | <b>&lt; 0,01</b> | <b>-15,75</b> | <b>0</b>            | <b>5</b>         |
| <b>Q9ERT9</b>     | Protein phosphatase 1 regulatory subunit 1A | Ppp1r1a       | < 0,05           | -9,09         | 0                   | 5                |
| <b>P58044</b>     | Isopentenyl-diphosphate Delta-isomerase 1   | Idi1          | < 0,05           | -5,57         | 0                   | 5                |
| <b>G5E870</b>     | E3 ubiquitin-protein ligase TRIP12          | Trip12        | < 0,05           | -3,60         | 0                   | 5                |
| <b>Q9Z0J0</b>     | Epididymal secretory protein E1             | Npc2          | < 0,05           | -3,49         | 4                   | 5                |
| <b>Q91XL1</b>     | <b>Leucine-rich HEV glycoprotein</b>        | <b>Lrg1</b>   | <b>&lt; 0,05</b> | <b>-3,40</b>  | <b>4</b>            | <b>5</b>         |
| <b>Q62356</b>     | Follistatin-related protein 1               | Fstl1         | < 0,05           | -3,16         | 4                   | 5                |
| <b>Q9QXC1</b>     | Fetuin-B                                    | Fetub         | < 0,05           | -2,60         | 4                   | 5                |
| <b>Q8QZR5</b>     | Alanine aminotransferase 1                  | Gpt           | < 0,05           | -2,39         | 4                   | 5                |
| <b>Q9DBX6</b>     | <b>Cytochrome P450 2S1</b>                  | <b>Cyp2s1</b> | <b>&lt; 0,05</b> | <b>-2,33</b>  | <b>4</b>            | <b>5</b>         |
| <b>P51855</b>     | Glutathione synthetase                      | Gss           | < 0,05           | -2,28         | 4                   | 5                |
| <b>P67984</b>     | 60S ribosomal protein L22                   | Rpl22         | < 0,05           | -2,07         | 4                   | 5                |
| <b>Q9D1X0</b>     | Nucleolar protein 3                         | Nol3          | < 0,05           | -2,05         | 4                   | 5                |
| <b>Q9QZ06</b>     | Toll-interacting protein                    | Tollip        | < 0,05           | -2,03         | 4                   | 5                |
| <b>Q9CXR1</b>     | Dehydrogenase/reductase SDR family member 7 | Dhrs7         | < 0,05           | -1,97         | 4                   | 5                |



|                   |                                                                         |                 |                  |              |          |          |
|-------------------|-------------------------------------------------------------------------|-----------------|------------------|--------------|----------|----------|
| <b>P62897</b>     | Cytochrome c, somatic                                                   | Cycs            | < 0,05           | -1,96        | 4        | 5        |
| <b>Q9R099</b>     | Transducin beta-like protein 2                                          | Tbl2            | < 0,05           | -1,93        | 4        | 5        |
| <b>Q9CQS8</b>     | Protein transport protein Sec61 subunit beta                            | Sec61b          | < 0,05           | -1,90        | 4        | 5        |
| <b>Q9ERE7</b>     | LDLR chaperone MESD                                                     | Mesdc2          | < 0,05           | -1,89        | 4        | 5        |
| <b>Q8R317</b>     | Ubiquilin-1                                                             | Ubqln1          | < 0,05           | -1,77        | 4        | 5        |
| <b>P63330</b>     | Serine/threonine-protein phosphatase 2A catalytic subunit alpha isoform | Ppp2ca          | < 0,05           | -1,74        | 4        | 5        |
| <b>Q9CQ65</b>     | S-methyl-5-thioadenosine phosphorylase                                  | Mtap            | < 0,05           | -1,72        | 4        | 5        |
| <b>Q922Q8</b>     | Leucine-rich repeat-containing protein 59                               | Lrrc59          | < 0,05           | -1,72        | 4        | 5        |
| <b>P17563</b>     | <b>Selenium-binding protein 1</b>                                       | <b>Selenbp1</b> | <b>&lt; 0,05</b> | <b>-1,71</b> | <b>4</b> | <b>5</b> |
| <b>P70296</b>     | Phosphatidylethanolamine-binding protein 1                              | Pebp1           | < 0,05           | -1,71        | 4        | 5        |
| <b>A0A0B4J1E7</b> | Importin subunit alpha-3                                                | Kpna4           | < 0,05           | -1,70        | 4        | 5        |
| <b>Q9Z1Z2</b>     | Serine-threonine kinase receptor-associated protein                     | Strap           | < 0,05           | -1,69        | 4        | 5        |
| <b>Q61035</b>     | Histidine--tRNA ligase, cytoplasmic                                     | Hars            | < 0,05           | -1,68        | 4        | 5        |
| <b>O08915</b>     | AH receptor-interacting protein                                         | Aip             | < 0,05           | -1,67        | 4        | 5        |
| <b>Q3UGR5</b>     | Haloacid dehalogenase-like hydrolase domain-containing protein 2        | Hdhd2           | < 0,05           | -1,67        | 4        | 5        |
| <b>P68037</b>     | Ubiquitin-conjugating enzyme E2 L3                                      | Ube2l3          | < 0,05           | -1,66        | 4        | 5        |
| <b>Q91YJ2</b>     | Sorting nexin-4                                                         | Snx4            | < 0,05           | -1,64        | 4        | 5        |
| <b>O35945</b>     | Aldehyde dehydrogenase, cytosolic 1                                     | Aldh1a7         | < 0,05           | -1,63        | 4        | 5        |
| <b>P57759</b>     | Endoplasmic reticulum resident protein 29                               | Erp29           | < 0,05           | -1,61        | 4        | 5        |
| <b>E9Q137</b>     | Testis-expressed gene 264                                               | Tex264          | < 0,05           | -1,61        | 4        | 5        |
| <b>Q9QZ88</b>     | Vacuolar protein sorting-associated protein 29                          | Vps29           | < 0,05           | -1,58        | 4        | 5        |
| <b>O70274</b>     | Protein tyrosine phosphatase type IVA 2                                 | Ptp4a2          | < 0,05           | -1,58        | 4        | 5        |
| <b>Q9DAK9</b>     | 14 kDa phosphohistidine phosphatase                                     | Phpt1           | < 0,05           | -1,57        | 4        | 5        |
| <b>Q91V41</b>     | Ras-related protein Rab-14                                              | Rab14           | < 0,05           | -1,56        | 4        | 5        |
| <b>O35598</b>     | Disintegrin and metalloproteinase domain-containing protein 10          | Adam10          | < 0,05           | -1,55        | 4        | 5        |
| <b>Q07797</b>     | Galectin-3-binding protein                                              | Lgals3bp        | < 0,05           | -1,55        | 4        | 5        |
| <b>Q8BKE6</b>     | Cytochrome P450 20A1                                                    | Cyp20a1         | < 0,05           | -1,55        | 4        | 5        |
| <b>Q8JZN1</b>     | Macrophage galactose N-acetyl-galactosamine-specific lectin 2           | Mgl2            | < 0,05           | -1,54        | 4        | 5        |
| <b>Q02819</b>     | Nucleobindin-1                                                          | Nucb1           | < 0,05           | -1,52        | 4        | 5        |
